# Supplementary material for: Physiological advantages of C4 grasses in the field: a comparative experiment demonstrating the importance of drought
Source: PubMed Central journal article supplement (PMC4237462; doi:10.1111/gcb.12498), 2014-03-28

## Taylor *et al.* supporting information

### S5) Plotted species means used for analysis

The mean values plotted by species, month and treatment on the following five pages were calculated from raw data, using R version 3.0.1 (R Core Team, 2013). Mean values based on  $\leq 2$  replicates were eliminated from the dataset, as were species means that were not paired across treatments in any given month. Error bars, where given, are SEM; where error bars are missing this is because values were calculated from species means, which represent a single value rather than measurements replicated across several plants.

Species codes:

Hc = *Heteropogon contortus* (C<sub>4</sub>, Andropogoneae)

Hh = *Hyparrhenia hirta* (C<sub>4</sub>, Andropogoneae)

Tt = *Themeda triandra* (C<sub>4</sub>, Andropogoneae)

As = *Alloteropsis semialata* ss. *eckloniana* (C<sub>3</sub>, Paniceae)

Pa = *Panicum aequinerve* (C<sub>3</sub>, Paniceae)

Pe = *Panicum ecklonii* (C<sub>3</sub>, Paniceae)

Ac = *Aristida congesta* ss. *barbicollis* (C<sub>4</sub>, Aristidoideae)

Ad = *Aristida diffusa* ss. *diffusa* (C<sub>4</sub>, Aristidoideae)

Aj = *Aristida junciformis* ss. *junciformis* (C<sub>4</sub>, Aristidoideae)

Kc = *Karoochloa curva* (C<sub>3</sub>, Danthonioideae)

Md = *Merxmuellera disticha* (C<sub>3</sub>, Danthonioideae)

Pc = *Pentaschistis curvifolia* (C<sub>3</sub>, Danthonioideae)

## References

R Core Team (2013) R: A language and environment for statistical computing. R Foundation for Statistical Computing, Vienna, Austria.



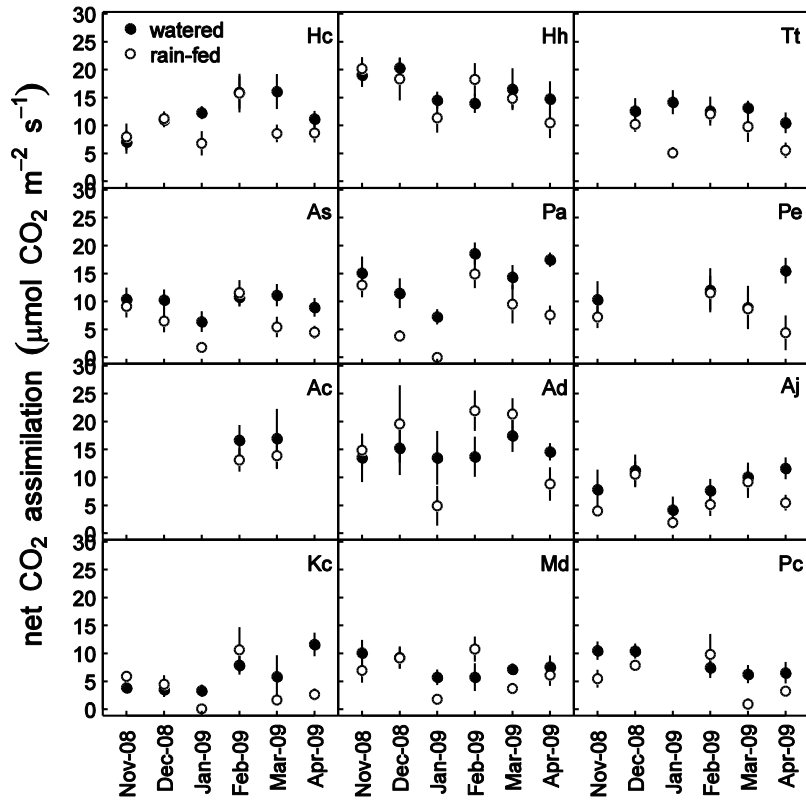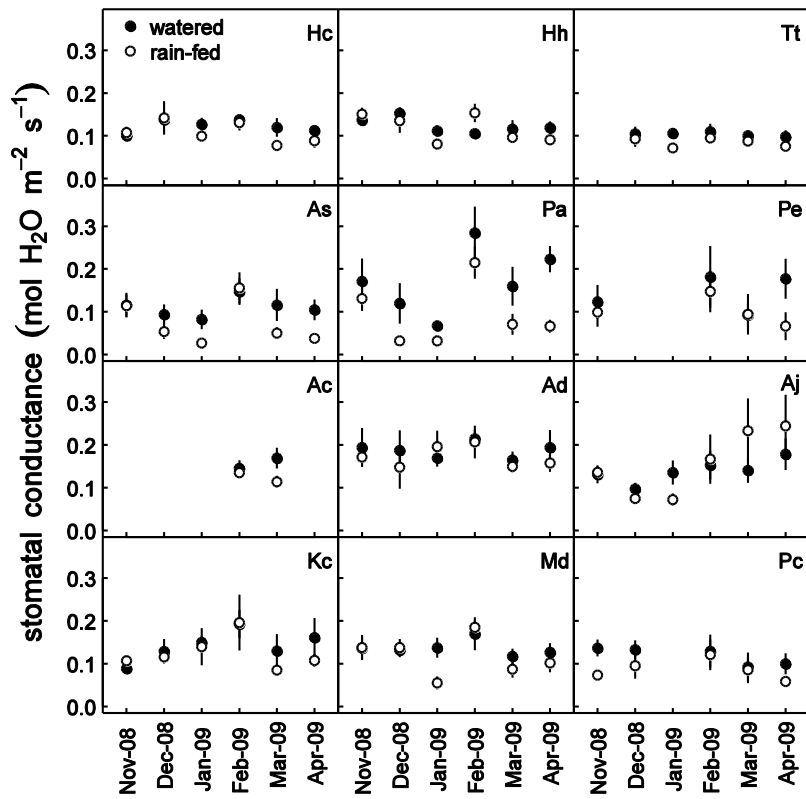

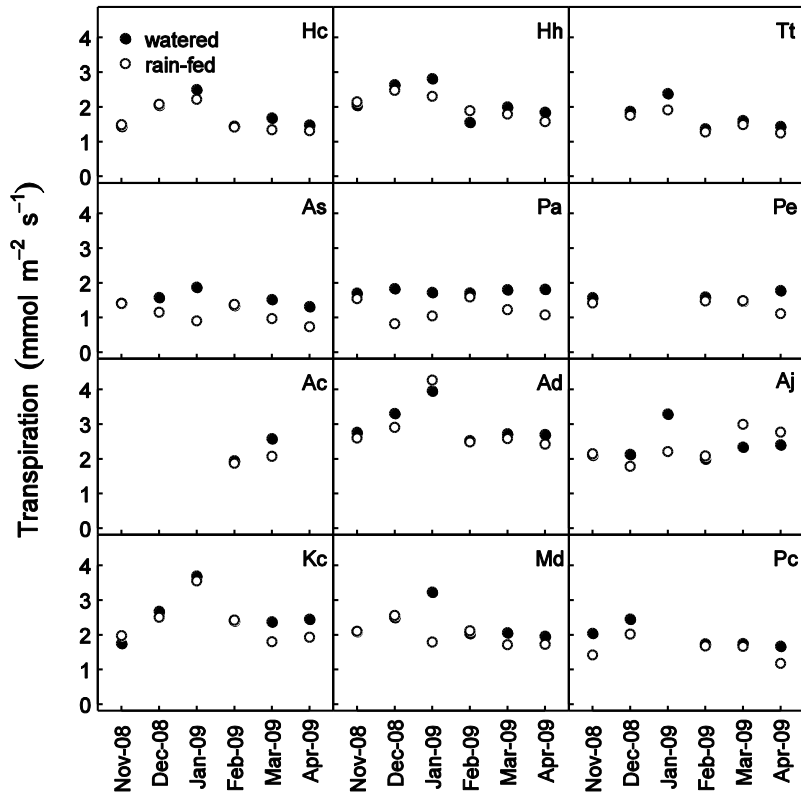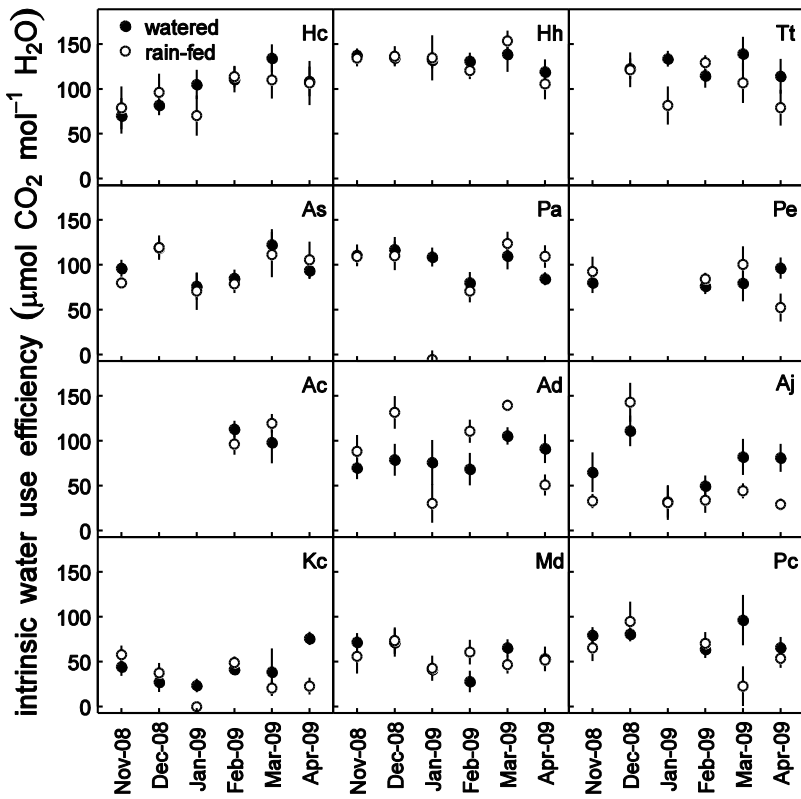

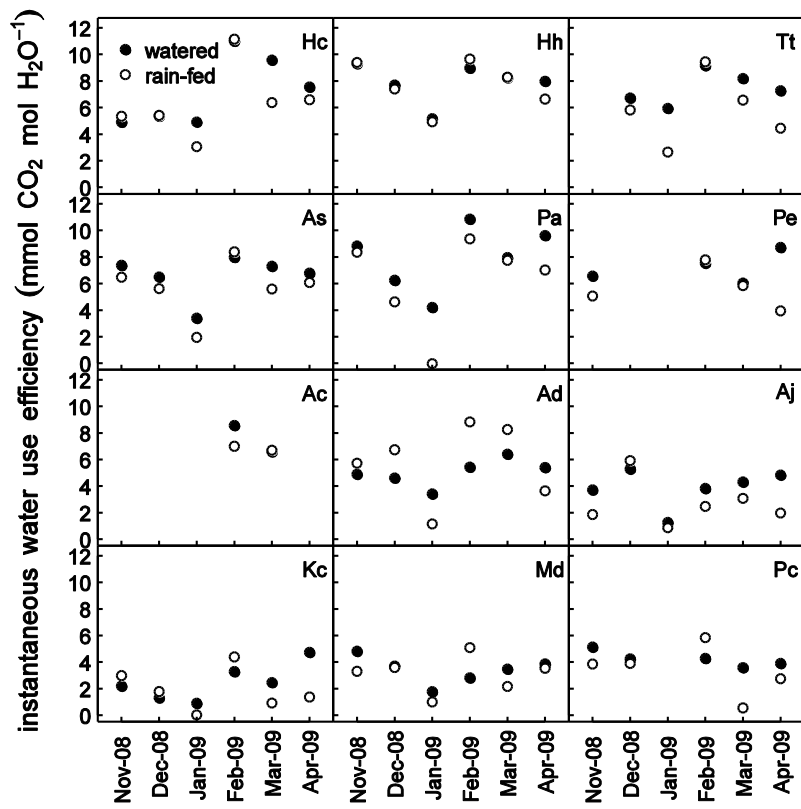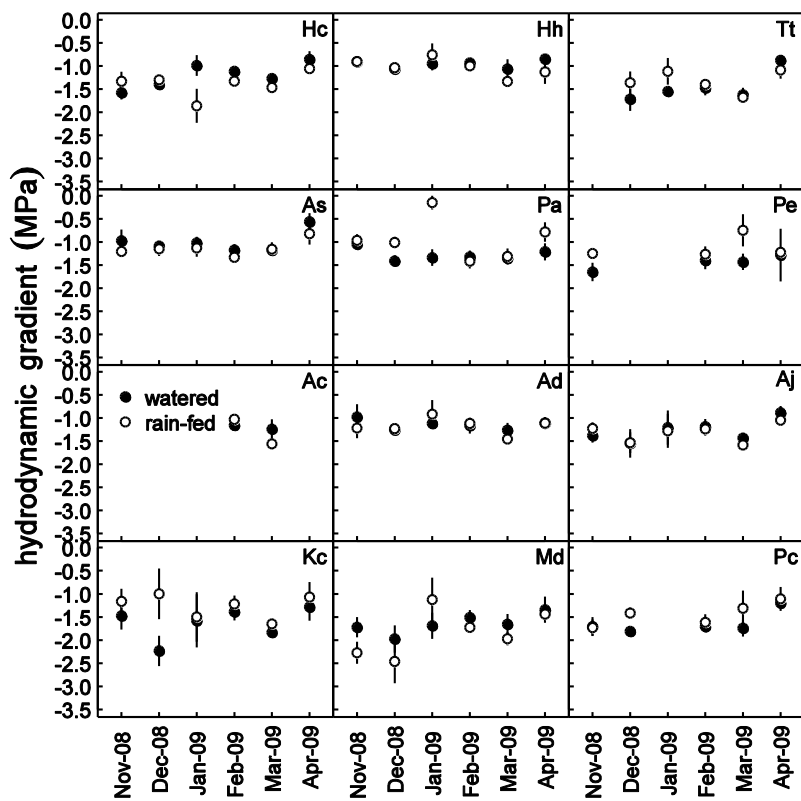

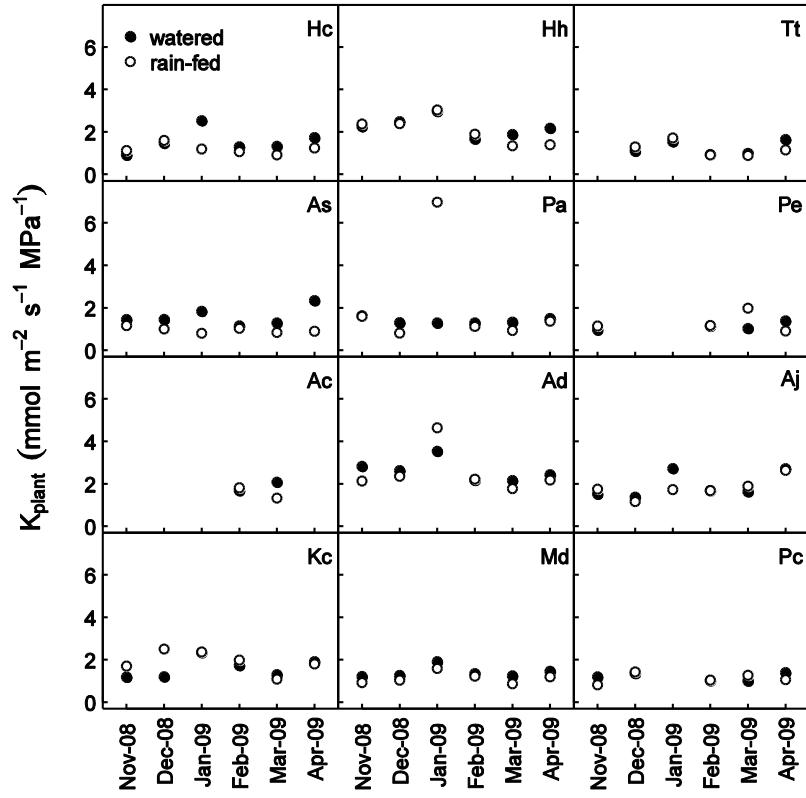

Supplement: gcb0020-1992-SD5.pdf [file gcb0020-1992-SD5.pdf]
