# Supplementary material for: Physiological advantages of C4 grasses in the field: a comparative experiment demonstrating the importance of drought
Source: PubMed Central journal article supplement (PMC4237462; doi:10.1111/gcb.12498), 2014-03-28
Supplement: gcb0020-1992-SD1.pdf [file gcb0020-1992-SD1.pdf]

## Taylor *et al.* supporting information

### S1) Equations used for estimation of reference crop evapotranspiration (ET<sub>0</sub>)

PET (potential evapotranspiration, mm d<sup>-1</sup>) was derived from daily mean values calculated from weather station data. With the exception of the approximation made for incoming solar radiation ( $R_s$ ), which is based on information on p. 22 of Jones (1992), the methods follow recommendations made by Allen *et al.* (1998) for the calculation of reference crop evapotranspiration (ET<sub>0</sub>). These methods assume a ‘hypothetical reference crop with an assumed crop height of 0.12 m, a fixed surface resistance of 70 s m<sup>-1</sup> and an albedo of 0.23 reference surface’ (Allen *et al.*, 1998) and meteorological measurements made at 2 m height above the ground surface. The result is that aerodynamic resistance  $r_a$  (s m<sup>-1</sup>) has the approximation 208/ $w$ , where  $w$  = windspeed (m s<sup>-1</sup>).

$$ET_0 = \frac{0.408\varepsilon R_{net} + \gamma \frac{900}{T_{air} + 273} w \delta e}{\varepsilon + \gamma(1 + 0.34w)} \quad eqn. S1.1$$

$T_{air}$  is daily mean air temperature (°C), the average of daily maximum ( $T_{max}$ , °C) and minimum air temperatures ( $T_{min}$ , °C):

$$T_{air} = \frac{T_{min} + T_{max}}{2} \quad eqn. S1.2$$

$w$  is daily mean windspeed at 2 m (m s<sup>-1</sup>), calculated similarly to daily mean temperature.

$$\delta e = e_s - e_a \quad eqn. S1.3$$

$e_s$  is daily mean saturation vapour pressure (kPa), the average of saturation vapour pressures at daily maximum ( $T_{max}$ , °C) and minimum air temperatures ( $T_{min}$ , °C):

$$e_s = \frac{e_{s,Tmin} + e_{s,Tmax}}{2} \quad eqn. S1.4$$

$$e_{s,T} = 0.6108 \exp\left(\frac{17.27T}{T+237.3}\right) \quad eqn. S1.5$$

$e_a$  is actual vapour pressure (kPa), calculated based on daily maximum ( $RH_{max}$ , %) and minimum ( $RH_{min}$ , %) relative humidities:

$$e_a = \frac{e_{s,Tmin}\left(\frac{RH_{max}}{100}\right) + e_{s,Tmax}\left(\frac{RH_{min}}{100}\right)}{2} \quad eqn. S1.6$$

$\varepsilon$  is the slope of vapour pressure curve (kPa °C<sup>-1</sup>):

$$\varepsilon = \frac{4098 \left(0.6108 \exp\left(\frac{17.27T_{air}}{T_{air} + 237.3}\right)\right)}{(T_{air} + 237.3)^2} \quad eqn. S1.7$$

$\gamma$  is the psychrometric constant (kPa °C<sup>-1</sup>):

$$\gamma = 0.665 \times 10^{-3} P \quad eqn. S1.8$$

$P$  is air pressure (kPa):

$$P = 101.3 \left(\frac{293 - 0.0065z}{293}\right)^{5.26} \quad eqn. S1.9$$

$z$  = site elevation (630 m)

$R_{net}$  is net radiation (MJ m<sup>-2</sup> d<sup>-1</sup>), calculated as the difference between net solar radiation ( $R_{ns}$ , MJ m<sup>-2</sup> d<sup>-1</sup>) and net longwave radiation ( $R_{nl}$ , MJ m<sup>-2</sup> d<sup>-1</sup>):

$$R_n = R_{ns} - R_{nl} \quad eqn. S1.10$$

$$R_{ns} = (1 - \alpha)R_s \quad \text{eqn. S1.11}$$

$\alpha$  is the albedo of the crop, 0.23 for the reference crop

$R_s$  is the solar radiation ( $\text{MJ m}^{-2} \text{ d}^{-1}$ ), approximated as shortwave irradiance, calculated from integrated daily PPFD ( $\mu\text{mol m}^{-2} \text{ d}^{-1}$ ) on the basis of information presented in Jones (1992; Table 2.2):

$$R_s = \frac{\text{PPFD}}{457 \times 200 \times 10^6} \quad \text{eqn. S1.12}$$

$$R_{nl} = \sigma \left( \frac{T_{min,K}^4 + T_{max,K}^4}{2} \right) (0.34 - 0.14\sqrt{e_a}) \left( 1.35 \frac{R_s}{R_{so}} - 0.35 \right) \quad \text{eqn. S1.13}$$

$\sigma$  is the Stefan-Boltzmann constant:  $4.903 \times 10^{-9} \text{ MJ K}^{-4} \text{ m}^{-2} \text{ d}^{-1}$

$T_{min,K}$  and  $T_{max,K}$  are the daily minimum and maximum temperatures (K), respectively:

$$T_K = T_c + 273.16 \quad \text{eqn. S1.14}$$

$R_{so}$  is the clear sky radiation ( $\text{MJ m}^{-2} \text{ d}^{-1}$ ):

$$R_{so} = (a_s + b_s)R_a \quad \text{eqn. S1.15}$$

$a_s$  and  $b_s$  are Angstrom constants: 0.25 and 0.5 respectively

$R_a$  is the extraterrestrial radiation ( $\text{MJ m}^{-2} \text{ d}^{-1}$ ):

$$R_a = \frac{24(60)}{\pi} G_{sc} d_r (\omega_s \sin(\varphi) \sin(\delta) + \cos(\varphi) \cos(\delta) \sin(\omega_s)) \quad \text{eqn. S1.16}$$

$\pi$  is 3.141593

$G_{sc}$  is the solar constant:  $0.082 \text{ MJ m}^{-2} \text{ min}^{-1}$

$d_r$  is the inverse relative distance Earth-Sun:

$$d_r = 1 + 0.033 \cos\left(\frac{2\pi}{365}J\right) \quad \text{eqn. S1.17}$$

$J$  is the Julian day

$\omega_s$  is the sunset hour angle (rad):

$$\omega_s = \arccos(-\tan(\varphi)\tan(\delta))$$

$\varphi$  is the latitude of the experimental site in this study:  $-0.5784021$  rad

$\delta$  is solar declination (rad):

$$\delta = 0.409 \sin\left(\frac{2\pi}{365}J - 1.39\right) \quad \text{eqn. S1.18}$$

## References

Allen RG, Pereira LS, Raes D, Smith M (1998) *Crop evapotranspiration - Guidelines for computing crop water requirements - FAO Irrigation and drainage paper 56*. Rome, FAO - Food and Agriculture Organization of the United Nations.

Jones HG (1992) *Plants and microclimate: a quantitative approach to environmental plant physiology*. Cambridge, United Kingdom, Cambridge University Press.
