# Supplementary material for: Physiological advantages of C4 grasses in the field: a comparative experiment demonstrating the importance of drought
Source: PubMed Central journal article supplement (PMC4237462; doi:10.1111/gcb.12498), 2014-03-28
Supplement: gcb0020-1992-SD2.pdf [file gcb0020-1992-SD2.pdf]

## 1 **Taylor *et al.* supporting information**

### 2 **S2) Model for estimation of leaf-level transpiration ( $E$ )**

3 The Penman-Monteith equation was combined with an iterative approach to model the leaf  
4 energy balance for a horizontal leaf suspended over a lawn. The model was parameterised  
5 using mean values for climate variables (Supplementary S3) and  $g_s$  (Supplementary S4) from  
6 each measurement period during the growing season. Methods below follow Jones (1992)  
7 unless noted.

8 The simplifying assumption was made that the leaves showed negligible loss of heat to sinks  
9 other than the air, thus we used the following modified version of the Penman-Monteith  
10 equation (Penman, 1948; Monteith, 1965):

$$\lambda E = \frac{\varepsilon R_{NET} + \rho_a c_p g_H \delta e}{\varepsilon + \left( \gamma \frac{g_H}{g_w} \right)} \quad \text{eqn. S2.1}$$

11  $\lambda E$ , latent heat flux ( $\text{J m}^{-2} \text{s}^{-1}$ )

$$12 \quad E = \frac{\lambda E}{18 \times \lambda_{T_{airC}}} \quad (\text{mmol m}^{-2} \text{s}^{-1}) \quad \text{eqn. S2.2}$$

13  $\lambda_{T_{airC}}$ , latent heat of vaporisation  $\leq 2.513 \text{ MJ kg}^{-1}$

$$14 \quad \lambda_{T_{airC}} = 1000(3.1512 \times 10^{-3} - 2.38 \times 10^{-6}(T_{airC} + 273)) \quad (\text{Friend,}$$

15 1995) *eqn. S2.3*

16  $T_{airC}$ , mean daily maximum of air temperature at 0.50 m during measurement period ( $^{\circ}\text{C}$ )

17 *continues overleaf...*

1  $\varepsilon$ , temperature dependent slope of the vapour pressure-temperature relationship ( $\text{Pa K}^{-1}$ )

$$\varepsilon = \frac{(e_{s,T_{\text{airC}}} - e_{s,T_{\text{airC}}-0.1})}{T_{\text{airC}} - (T_{\text{airC}} - 0.1)} \quad \text{eqn. S2.4}$$

$$e_{s,T_{\text{airC}}} = 613.75 \exp\left(\frac{17.502 T_{\text{airC}}}{240.97 + T_{\text{airC}}}\right) \quad \text{eqn. S2.5}$$

2  $R_{\text{NET}}$ , instantaneous net radiation ( $\text{J m}^{-2} \text{s}^{-1}$ ): derived from a model of leaf energy balance for  
3 a horizontal leaf suspended over a lawn

$$R_{\text{NET}} = \alpha_{s,\text{leaf}}(I_s + I_s \rho_{s,\text{lawn}}) + I_{ld} + \sigma T_{\text{lawn}}^4 - 2\sigma T_{\text{leaf}}^4 \quad \text{eqn. S2.6}$$

5 The temperatures (K), of the lawn above which the leaf was considered to be suspended,  
6  $T_{\text{lawn}}$ , and of the leaf,  $T_{\text{leaf}}$ , were determined by iteration. Between each round of simulation  
7  $T_{\text{lawn}}$  was set to match  $T_{\text{leaf}}$ . The model was considered to have converged once change in  
8  $T_{\text{leaf}}$  between rounds of simulation was  $<0.1 \text{ }^\circ\text{C}$ .

9  $\alpha_{s,\text{leaf}}$ , leaf absorption coefficient for shortwave radiation = 0.5

10  $\rho_{s,\text{lawn}}$ , reflection coefficient for lawn = 0.23

11  $\sigma$ , Stefan-Boltzmann constant =  $5.6703 \times 10^{-8} \text{ J m}^{-2} \text{ K}^{-4} \text{ s}^{-1}$

12  $I_s$ , shortwave irradiance ( $\text{J m}^{-2} \text{ s}^{-1}$ )

13  $I_s = 200/457 \times \text{PPFD}_{\text{max}}$  (Table 2.2 of Jones, 1992) *eqn. S2.7*

14  $\text{PPFD}_{\text{max}}$ , maximum daily PPFD ( $\mu\text{mol m}^{-2} \text{ s}^{-1}$ )

15

16 *continues overleaf...*

1  $I_{ld}$ , downward irradiance in the longwave assuming a clear sky

2  $I_{ld} = \sigma(T_{airK} - 20)^4$  eqn.S2.8

3  $T_{airK}$ , air temperature (K)

4  $T_{airK} = T_{airC} + 273.16$  eqn.S2.9

5  $\rho_a$ , temperature dependent density of dry air  $\leq 1.317 \text{ kg m}^{-3}$

$$\rho_a = \frac{P}{R_{air}(T_{airC} + 273)} \quad \text{eqn.S2.10}$$

6  $P$ , air pressure (Pa)

7  $R_{air}$ , specific gas constant for air ( $\text{J K}^{-1} \text{ kg}^{-1}$ )

$$R_{air} = \frac{R}{M_{air}} \quad \text{eqn.S2.11}$$

8  $R$ , gas constant =  $8.3144 \text{ J K}^{-1} \text{ mol}^{-1}$

9  $M_{air}$ , molecular weight of air =  $28.964 \times 10^{-3} \text{ kg mol}^{-1}$

10  $c_p$ , specific heat capacity of water =  $1011 \text{ J kg}^{-1} \text{ K}^{-1}$

11

12 *continues overleaf...*

1  $g_H$ , boundary layer conductance ( $\text{m s}^{-1}$ )

2  $g_H = 6.62 \times 10^{-3} (w_{0.5}/d)^{0.5}$  *eqn. S2.12*

3  $w_{0.5}$ , mean windspeed at 0.5 m during measurement period ( $\text{m s}^{-1}$ )

4  $w_{0.5} = \frac{u^*}{0.4} \log \frac{0.5(1-0.65)}{z_m}$  (Campbell & Norman, 1998; chapter 5) *eqn. S2.13*

5  $u^* = 0.4 \left[ \frac{w}{\log \left( \frac{2-d_0}{z_m} \right)} \right]$  *eqn. S2.14*

6  $w$ , mean windspeed at 2 m during measurement period ( $\text{m s}^{-1}$ )

7  $d_0$ , zero plane displacement (m)

8  $d_0 = 0.65h$  *eqn. S2.15*

9  $h$ , height of lawn surrounding plots = 0.02 m

10  $z_m$ , momentum roughness parameter (m)

11  $z_m = 0.1h$  *eqn. S2.16*

12

13 *continues overleaf...*

- 1  $d$ , average leaf characteristic dimension (m): average of maximum and minimum widths  
 2 reported by Gibbs Russell *et al.* (1990); where a minimum was not reported it was assumed  
 3 to be 0.5 mm.

| Species                         | Leaf width (mm) |
|---------------------------------|-----------------|
| <i>Themeda triandra</i>         | 4.5             |
| <i>Heteropogon contortus</i>    | 5.4             |
| <i>Hypparhenia hirta</i>        | 4.25            |
| <i>Aristida diffusa</i>         | 1.25            |
| <i>Aristida junciformis</i>     | 1.75            |
| <i>Aristida congesta</i>        | 0.75            |
| <i>Panicum ecklonii</i>         | 5.5             |
| <i>Alloteropsis eckloniana</i>  | 7.5             |
| <i>Panicum aequinerve</i>       | 6.5             |
| <i>Pentaschistis curvifolia</i> | 2.25            |
| <i>Merxmuellera disticha</i>    | 2               |
| <i>Karoochloa curva</i>         | 1.25            |

4

- 5  $\delta e$ , vapour pressure deficit (Pa)

$$\delta e = e_{s,Tairc} - e_a \quad \text{eqn. S2.17}$$

- 6  $e_a$ , ambient vapour pressure (Pa)

$$e_a = \frac{RH}{100} e_{s,Tairc} \quad \text{eqn. S2.18}$$

- 7  $RH$ , mean relative humidity (%)

- 8  $\gamma$ , temperature and air-pressure dependent value of the psychrometric constant (Pa K<sup>-1</sup>)

$$\gamma = \frac{Pc_p}{0.622(\lambda_{Tairc} \times 10^6)} \quad \text{eqn. S2.19}$$

9

- 10 *continues overleaf...*

1  $g_w$ , leaf conductance to water vapour ( $\text{m s}^{-1}$ )

$$g_w = \frac{1}{\frac{1}{g_H} + \frac{1}{g_s}} \quad \text{eqn. S2.20}$$

2  $g_s$ , mean stomatal conductance during measurement period ( $\text{m s}^{-1}$ ), for units conversion see

3 Appendix 3 of Jones (1992)

4

## 5 **References**

6 Campbell GS, Norman JM (1998) *Introduction to environmental biophysics*. Springer

7 Science + Business Media, New York.

8 Friend AD (1995) PGEN: An integrated model of leaf photosynthesis, transpiration, and

9 conductance. *Ecological Modelling*, **77**, 233-255.

10 Gibbs Russell GE, Watson L, Koekmoer L, Smook L, Barker NP, Anderson HM, Dallwitz

11 MJ (1990) *Grasses of Southern Africa*. Pretoria, National Botanical Gardens.

12 Jones HG (1992) *Plants and microclimate: a quantitative approach to environmental plant*

13 *physiology*. Cambridge, United Kingdom, Cambridge University Press.

14 Penman HL (1948) Natural evaporation from open water, bare soil and grass. *Proceedings of*

15 *the Royal Society A*, **193**, 120-145.

16 Monteith JL (1965) Evaporation and environment. *Symposia of the Society for Experimental*

17 *Biology*, **19**, 205-234.
