# Supplementary material for: Physiological advantages of C4 grasses in the field: a comparative experiment demonstrating the importance of drought
Source: PubMed Central journal article supplement (PMC4237462; doi:10.1111/gcb.12498), 2014-03-28
Supplement: gcb0020-1992-SD3.pdf [file gcb0020-1992-SD3.pdf]

## Taylor *et al.* Supplementary materials

### S3) Mean values for microclimate used in modelling of leaf-level transpiration (*E*)

Values are means, for each sampling period, of daily values for each parameter.

Windspeed was recorded at 2 m, PPFD was recorded at 1.5 m, relative humidity and temperature were recorded at 0.5 m

| Period                                           | Minimum windspeed<br>(m s <sup>-1</sup> ) | Maximum windspeed<br>(m s <sup>-1</sup> ) |
|--------------------------------------------------|-------------------------------------------|-------------------------------------------|
| November 17 <sup>th</sup> -28 <sup>th</sup> 2008 | 0.58                                      | 5.52                                      |
| December 12 <sup>th</sup> -31 <sup>st</sup> 2008 | 1.08                                      | 6.49                                      |
| January 18 <sup>th</sup> -27 <sup>th</sup> 2009  | 0.65                                      | 6.62                                      |
| February 16 <sup>th</sup> -28 <sup>th</sup> 2009 | 0.52                                      | 5.07                                      |
| March 15 <sup>th</sup> -31 <sup>st</sup> 2009    | 1.03                                      | 5.99                                      |
| April 15 <sup>th</sup> -26 <sup>th</sup> 2009    | 0.83                                      | 5.63                                      |

| Period                                           | Maximum<br>Relative<br>Humidity<br>(%) | Minimum<br>Relative<br>Humidity<br>(%) | Maximum<br>Temperature<br>(°C) | Minimum<br>Temperature<br>(°C) |
|--------------------------------------------------|----------------------------------------|----------------------------------------|--------------------------------|--------------------------------|
| November 17 <sup>th</sup> -28 <sup>th</sup> 2008 | 91.9                                   | 56.5                                   | 25.5                           | 13.0                           |
| December 12 <sup>th</sup> -31 <sup>st</sup> 2008 | 88.2                                   | 55.0                                   | 28.0                           | 13.9                           |
| January 18 <sup>th</sup> -27 <sup>th</sup> 2009  | 89.4                                   | 47.6                                   | 30.4                           | 14.0                           |
| February 16 <sup>th</sup> -28 <sup>th</sup> 2009 | 91.6                                   | 65.7                                   | 26.9                           | 14.8                           |
| March 15 <sup>th</sup> -31 <sup>st</sup> 2009    | 91.3                                   | 47.7                                   | 24.2                           | 11.1                           |
| April 15 <sup>th</sup> -26 <sup>th</sup> 2009    | 97.1                                   | 47.7                                   | 23.6                           | 12.2                           |

| Period                                           | Maximum PPFD<br>( $\mu\text{mol m}^{-2} \text{s}^{-1}$ ) |
|--------------------------------------------------|----------------------------------------------------------|
| November 17 <sup>th</sup> -28 <sup>th</sup> 2008 | 1843                                                     |
| December 12 <sup>th</sup> -31 <sup>st</sup> 2008 | 1956                                                     |
| January 18 <sup>th</sup> -27 <sup>th</sup> 2009  | 2006                                                     |
| February 16 <sup>th</sup> -28 <sup>th</sup> 2009 | 1732                                                     |
| March 15 <sup>th</sup> -31 <sup>st</sup> 2009    | 1688                                                     |
| April 15 <sup>th</sup> -26 <sup>th</sup> 2009    | 1357                                                     |
