# Supplementary material for: Physiological advantages of C4 grasses in the field: a comparative experiment demonstrating the importance of drought
Source: PubMed Central journal article supplement (PMC4237462; doi:10.1111/gcb.12498), 2014-03-28
Supplement: gcb0020-1992-SD4.pdf [file gcb0020-1992-SD4.pdf]

## Taylor *et al.* supporting information

### S4) Tabulated values for physiological traits determined in the field, by species, month of measurement and treatment

The mean values on the following four pages were calculated from raw data, using R version 3.0.1 (R Core Team, 2013). Mean values based on  $\leq 2$  replicates were eliminated from the dataset, as were species means that were not paired across treatments in any given month.

Species codes:

Hc = *Heteropogon contortus* (C<sub>4</sub>, Andropogoneae)

Hh = *Hyparrhenia hirta* (C<sub>4</sub>, Andropogoneae)

Tt = *Themeda triandra* (C<sub>4</sub>, Andropogoneae)

As = *Alloteropsis semialata* *ss. eckloniana* (C<sub>3</sub>, Paniceae)

Pa = *Panicum aequinerve* (C<sub>3</sub>, Paniceae)

Pe = *Panicum ecklonii* (C<sub>3</sub>, Paniceae)

Ac = *Aristida congesta* *ss. barbicollis* (C<sub>4</sub>, Aristidoideae)

Ad = *Aristida diffusa* *ss. diffusa* (C<sub>4</sub>, Aristidoideae)

Aj = *Aristida junciformis* *ss. junciformis* (C<sub>4</sub>, Aristidoideae)

Kc = *Karoochloa curva* (C<sub>3</sub>, Danthonioideae)

Md = *Merxmuellera disticha* (C<sub>3</sub>, Danthonioideae)

Pc = *Pentaschistis curvifolia* (C<sub>3</sub>, Danthonioideae)

Treatment codes:

n = natural rainfall

w = supplemental watering

N = sample sizes

Missing values are indicated by hyphens

## References

R Core Team (2013) R: A language and environment for statistical computing. R Foundation for Statistical Computing, Vienna, Austria.

## Andropogoneae (C<sub>4</sub>)

| Species <sup>1</sup> | Month  | Treatment <sup>2</sup> | Net CO <sub>2</sub> assimilation rate                  |   | Stomatal conductance                   |   | Midday leaf water potential |   | Pre-dawn leaf water potential |   |
|----------------------|--------|------------------------|--------------------------------------------------------|---|----------------------------------------|---|-----------------------------|---|-------------------------------|---|
|                      |        |                        | ( $\mu\text{mol CO}_2 \text{ m}^{-2} \text{ s}^{-1}$ ) | N | ( $\text{mol m}^{-2} \text{ s}^{-1}$ ) | N | (MPa)                       | N | (MPa)                         | N |
| Hc                   | Nov-08 | n                      | 7.95                                                   | 7 | 0.108                                  | 7 | -1.70                       | 7 | -0.38                         | 6 |
| Hc                   | Dec-08 | n                      | 11.23                                                  | 5 | 0.142                                  | 5 | -1.60                       | 4 | -0.30                         | 4 |
| Hc                   | Jan-09 | n                      | 6.79                                                   | 5 | 0.099                                  | 5 | -2.44                       | 5 | -0.69                         | 4 |
| Hc                   | Feb-09 | n                      | 15.80                                                  | 6 | 0.131                                  | 6 | -1.57                       | 6 | -0.21                         | 5 |
| Hc                   | Mar-09 | n                      | 8.56                                                   | 6 | 0.078                                  | 6 | -1.88                       | 6 | -0.42                         | 6 |
| Hc                   | Apr-09 | n                      | 8.65                                                   | 7 | 0.088                                  | 7 | -2.06                       | 7 | -1.00                         | 7 |
| Hc                   | Nov-08 | w                      | 7.05                                                   | 8 | 0.100                                  | 8 | -1.89                       | 8 | -0.36                         | 7 |
| Hc                   | Dec-08 | w                      | 10.98                                                  | 5 | 0.137                                  | 5 | -1.68                       | 4 | -0.28                         | 4 |
| Hc                   | Jan-09 | w                      | 12.29                                                  | 6 | 0.127                                  | 6 | -1.58                       | 6 | -0.51                         | 5 |
| Hc                   | Feb-09 | w                      | 15.92                                                  | 7 | 0.138                                  | 7 | -1.39                       | 7 | -0.17                         | 6 |
| Hc                   | Mar-09 | w                      | 16.09                                                  | 7 | 0.120                                  | 7 | -1.57                       | 7 | -0.30                         | 7 |
| Hc                   | Apr-09 | w                      | 11.17                                                  | 8 | 0.112                                  | 8 | -1.73                       | 8 | -0.88                         | 8 |
| Hh                   | Nov-08 | n                      | 20.17                                                  | 8 | 0.151                                  | 8 | -1.19                       | 6 | -0.29                         | 6 |
| Hh                   | Dec-08 | n                      | 18.32                                                  | 5 | 0.135                                  | 5 | -1.23                       | 4 | -0.19                         | 4 |
| Hh                   | Jan-09 | n                      | 11.36                                                  | 6 | 0.081                                  | 6 | -1.98                       | 6 | -1.16                         | 5 |
| Hh                   | Feb-09 | n                      | 18.24                                                  | 7 | 0.154                                  | 7 | -1.24                       | 7 | -0.22                         | 6 |
| Hh                   | Mar-09 | n                      | 14.84                                                  | 7 | 0.096                                  | 7 | -1.67                       | 7 | -0.34                         | 7 |
| Hh                   | Apr-09 | n                      | 10.47                                                  | 8 | 0.091                                  | 8 | -2.48                       | 8 | -1.35                         | 8 |
| Hh                   | Nov-08 | w                      | 19.01                                                  | 8 | 0.137                                  | 8 | -1.26                       | 6 | -0.35                         | 6 |
| Hh                   | Dec-08 | w                      | 20.32                                                  | 6 | 0.153                                  | 6 | -1.21                       | 4 | -0.17                         | 3 |
| Hh                   | Jan-09 | w                      | 14.53                                                  | 6 | 0.112                                  | 6 | -1.48                       | 6 | -0.58                         | 5 |
| Hh                   | Feb-09 | w                      | 13.96                                                  | 7 | 0.105                                  | 7 | -1.20                       | 7 | -0.18                         | 6 |
| Hh                   | Mar-09 | w                      | 16.49                                                  | 7 | 0.116                                  | 7 | -1.43                       | 7 | -0.36                         | 7 |
| Hh                   | Apr-09 | w                      | 14.75                                                  | 8 | 0.119                                  | 8 | -1.76                       | 8 | -0.91                         | 8 |
| Tt                   | Nov-08 | n                      | -                                                      | - | -                                      | - | -                           | - | -                             | - |
| Tt                   | Dec-08 | n                      | -                                                      | - | -                                      | - | -                           | - | -                             | - |
| Tt                   | Jan-09 | n                      | 10.21                                                  | 5 | 0.093                                  | 5 | -1.85                       | 4 | -0.49                         | 4 |
| Tt                   | Feb-09 | n                      | 5.07                                                   | 7 | 0.072                                  | 7 | -2.90                       | 7 | -1.88                         | 6 |
| Tt                   | Mar-09 | n                      | 12.06                                                  | 7 | 0.095                                  | 7 | -1.67                       | 7 | -0.32                         | 6 |
| Tt                   | Apr-09 | n                      | 9.78                                                   | 7 | 0.088                                  | 7 | -2.21                       | 7 | -0.54                         | 7 |
| Tt                   | Nov-08 | w                      | 5.55                                                   | 8 | 0.076                                  | 8 | -2.42                       | 8 | -1.33                         | 8 |
| Tt                   | Dec-08 | w                      | 12.59                                                  | 6 | 0.105                                  | 6 | -1.92                       | 3 | -0.20                         | 3 |
| Tt                   | Jan-09 | w                      | 14.17                                                  | 6 | 0.106                                  | 6 | -2.05                       | 6 | -0.49                         | 5 |
| Tt                   | Feb-09 | w                      | 12.57                                                  | 7 | 0.110                                  | 7 | -1.67                       | 7 | -0.24                         | 6 |
| Tt                   | Mar-09 | w                      | 13.15                                                  | 6 | 0.100                                  | 6 | -2.05                       | 6 | -0.43                         | 6 |
| Tt                   | Apr-09 | w                      | 10.47                                                  | 7 | 0.098                                  | 7 | -1.96                       | 7 | -1.08                         | 7 |

*Continued overleaf...*

### Paniceae (C<sub>3</sub>)

| Species <sup>1</sup> | Month  | Treatment <sup>2</sup> | Net CO <sub>2</sub> assimilation rate                  |   | Stomatal conductance                   |   | Midday leaf water potential |   | Pre-dawn leaf water potential |   |
|----------------------|--------|------------------------|--------------------------------------------------------|---|----------------------------------------|---|-----------------------------|---|-------------------------------|---|
|                      |        |                        | ( $\mu\text{mol CO}_2 \text{ m}^{-2} \text{ s}^{-1}$ ) | N | ( $\text{mol m}^{-2} \text{ s}^{-1}$ ) | N | (MPa)                       | N | (MPa)                         | N |
| As                   | Nov-08 | n                      | 9.10                                                   | 8 | 0.114                                  | 8 | -1.58                       | 8 | -0.39                         | 7 |
| As                   | Dec-08 | n                      | 6.48                                                   | 5 | 0.054                                  | 5 | -1.53                       | 4 | -0.38                         | 4 |
| As                   | Jan-09 | n                      | 1.76                                                   | 6 | 0.027                                  | 6 | -2.35                       | 6 | -1.19                         | 5 |
| As                   | Feb-09 | n                      | 11.55                                                  | 7 | 0.156                                  | 7 | -1.54                       | 7 | -0.23                         | 6 |
| As                   | Mar-09 | n                      | 5.42                                                   | 7 | 0.050                                  | 7 | -1.71                       | 7 | -0.56                         | 7 |
| As                   | Apr-09 | n                      | 4.47                                                   | 7 | 0.038                                  | 7 | -2.07                       | 7 | -1.25                         | 7 |
| As                   | Nov-08 | w                      | 10.41                                                  | 7 | 0.116                                  | 7 | -1.49                       | 7 | -0.53                         | 6 |
| As                   | Dec-08 | w                      | 10.26                                                  | 6 | 0.094                                  | 6 | -1.33                       | 4 | -0.24                         | 4 |
| As                   | Jan-09 | w                      | 6.36                                                   | 6 | 0.082                                  | 6 | -1.70                       | 6 | -0.58                         | 5 |
| As                   | Feb-09 | w                      | 10.77                                                  | 7 | 0.147                                  | 7 | -1.37                       | 7 | -0.21                         | 6 |
| As                   | Mar-09 | w                      | 11.11                                                  | 6 | 0.116                                  | 6 | -1.55                       | 6 | -0.37                         | 6 |
| As                   | Apr-09 | w                      | 8.94                                                   | 7 | 0.105                                  | 7 | -1.66                       | 7 | -1.09                         | 7 |
| Pa                   | Nov-08 | n                      | 12.92                                                  | 8 | 0.131                                  | 8 | -1.40                       | 3 | -0.43                         | 3 |
| Pa                   | Dec-08 | n                      | 3.80                                                   | 5 | 0.032                                  | 5 | -1.43                       | 4 | -0.41                         | 4 |
| Pa                   | Jan-09 | n                      | -0.03                                                  | 6 | 0.032                                  | 6 | -3.20                       | 5 | -3.00                         | 4 |
| Pa                   | Feb-09 | n                      | 14.91                                                  | 7 | 0.215                                  | 7 | -1.61                       | 7 | -0.22                         | 6 |
| Pa                   | Mar-09 | n                      | 9.51                                                   | 7 | 0.071                                  | 7 | -2.09                       | 7 | -0.77                         | 7 |
| Pa                   | Apr-09 | n                      | 7.55                                                   | 8 | 0.066                                  | 8 | -2.55                       | 8 | -1.71                         | 7 |
| Pa                   | Nov-08 | w                      | 15.08                                                  | 8 | 0.171                                  | 8 | -1.35                       | 2 | -0.30                         | 2 |
| Pa                   | Dec-08 | w                      | 11.46                                                  | 5 | 0.120                                  | 5 | -1.64                       | 4 | -0.23                         | 4 |
| Pa                   | Jan-09 | w                      | 7.25                                                   | 6 | 0.067                                  | 6 | -1.95                       | 6 | -0.62                         | 5 |
| Pa                   | Feb-09 | w                      | 18.56                                                  | 7 | 0.284                                  | 7 | -1.47                       | 7 | -0.19                         | 6 |
| Pa                   | Mar-09 | w                      | 14.35                                                  | 7 | 0.160                                  | 7 | -1.77                       | 7 | -0.41                         | 7 |
| Pa                   | Apr-09 | w                      | 17.46                                                  | 8 | 0.223                                  | 8 | -2.20                       | 8 | -0.99                         | 8 |
| Pe                   | Nov-08 | n                      | 7.20                                                   | 6 | 0.099                                  | 6 | -1.85                       | 3 | -0.98                         | 2 |
| Pe                   | Dec-08 | n                      | -                                                      | - | -                                      | - | -                           | - | -                             | - |
| Pe                   | Jan-09 | n                      | -                                                      | - | -                                      | - | -                           | - | -                             | - |
| Pe                   | Feb-09 | n                      | 11.51                                                  | 4 | 0.147                                  | 4 | -1.78                       | 4 | -0.43                         | 3 |
| Pe                   | Mar-09 | n                      | 8.68                                                   | 3 | 0.094                                  | 3 | -1.60                       | 2 | -0.85                         | 2 |
| Pe                   | Apr-09 | n                      | 4.39                                                   | 3 | 0.067                                  | 3 | -2.28                       | 2 | -1.05                         | 2 |
| Pe                   | Nov-08 | w                      | 10.34                                                  | 7 | 0.123                                  | 7 | -1.78                       | 3 | -0.43                         | 2 |
| Pe                   | Dec-08 | w                      | -                                                      | - | -                                      | - | -                           | - | -                             | - |
| Pe                   | Jan-09 | w                      | -                                                      | - | -                                      | - | -                           | - | -                             | - |
| Pe                   | Feb-09 | w                      | 12.00                                                  | 4 | 0.182                                  | 4 | -1.63                       | 3 | -0.23                         | 3 |
| Pe                   | Mar-09 | w                      | 8.89                                                   | 4 | 0.093                                  | 4 | -1.73                       | 3 | -0.30                         | 3 |
| Pe                   | Apr-09 | w                      | 15.50                                                  | 4 | 0.177                                  | 4 | -2.43                       | 3 | -1.15                         | 3 |

*Continued overleaf...*

***Aristida* spp. (C<sub>4</sub>)**

| Species <sup>1</sup> | Month  | Treatment <sup>2</sup> | Net CO <sub>2</sub> assimilation rate                  |   | Stomatal conductance                   |   | Midday leaf water potential |   | Pre-dawn leaf water potential |   |
|----------------------|--------|------------------------|--------------------------------------------------------|---|----------------------------------------|---|-----------------------------|---|-------------------------------|---|
|                      |        |                        | ( $\mu\text{mol CO}_2 \text{ m}^{-2} \text{ s}^{-1}$ ) | N | ( $\text{mol m}^{-2} \text{ s}^{-1}$ ) | N | (MPa)                       | N | (MPa)                         | N |
| Ac                   | Nov-08 | n                      | -                                                      | - | -                                      | - | -                           | - | -                             | - |
| Ac                   | Dec-08 | n                      | -                                                      | - | -                                      | - | -                           | - | -                             | - |
| Ac                   | Jan-09 | n                      | -                                                      | - | -                                      | - | -                           | - | -                             | - |
| Ac                   | Feb-09 | n                      | 13.11                                                  | 3 | 0.135                                  | 3 | -1.37                       | 3 | -0.33                         | 3 |
| Ac                   | Mar-09 | n                      | 13.88                                                  | 4 | 0.114                                  | 4 | -1.90                       | 4 | -0.34                         | 4 |
| Ac                   | Apr-09 | n                      | -                                                      | - | -                                      | - | -                           | - | -                             | - |
| Ac                   | Nov-08 | w                      | -                                                      | - | -                                      | - | -                           | - | -                             | - |
| Ac                   | Dec-08 | w                      | -                                                      | - | -                                      | - | -                           | - | -                             | - |
| Ac                   | Jan-09 | w                      | -                                                      | - | -                                      | - | -                           | - | -                             | - |
| Ac                   | Feb-09 | w                      | 16.66                                                  | 6 | 0.145                                  | 6 | -1.52                       | 6 | -0.30                         | 5 |
| Ac                   | Mar-09 | w                      | 16.97                                                  | 6 | 0.169                                  | 6 | -1.73                       | 6 | -0.49                         | 6 |
| Ac                   | Apr-09 | w                      | -                                                      | - | -                                      | - | -                           | - | -                             | - |
| Ad                   | Nov-08 | n                      | 14.87                                                  | 5 | 0.172                                  | 5 | -1.67                       | 5 | -0.45                         | 5 |
| Ad                   | Dec-08 | n                      | 19.58                                                  | 3 | 0.148                                  | 3 | -1.52                       | 3 | -0.28                         | 3 |
| Ad                   | Jan-09 | n                      | 4.91                                                   | 6 | 0.196                                  | 6 | -2.60                       | 6 | -1.70                         | 5 |
| Ad                   | Feb-09 | n                      | 21.93                                                  | 6 | 0.207                                  | 6 | -1.42                       | 6 | -0.30                         | 5 |
| Ad                   | Mar-09 | n                      | 21.33                                                  | 6 | 0.150                                  | 6 | -1.88                       | 6 | -0.43                         | 6 |
| Ad                   | Apr-09 | n                      | 8.82                                                   | 7 | 0.158                                  | 7 | -2.04                       | 7 | -0.93                         | 7 |
| Ad                   | Nov-08 | w                      | 13.53                                                  | 6 | 0.194                                  | 6 | -1.75                       | 6 | -0.80                         | 5 |
| Ad                   | Dec-08 | w                      | 15.25                                                  | 6 | 0.187                                  | 6 | -1.58                       | 4 | -0.31                         | 4 |
| Ad                   | Jan-09 | w                      | 13.50                                                  | 6 | 0.170                                  | 6 | -1.77                       | 6 | -0.68                         | 5 |
| Ad                   | Feb-09 | w                      | 13.69                                                  | 7 | 0.214                                  | 7 | -1.44                       | 7 | -0.28                         | 6 |
| Ad                   | Mar-09 | w                      | 17.45                                                  | 7 | 0.165                                  | 7 | -1.69                       | 7 | -0.42                         | 7 |
| Ad                   | Apr-09 | w                      | 14.58                                                  | 8 | 0.194                                  | 8 | -1.91                       | 8 | -0.80                         | 8 |
| Aj                   | Nov-08 | n                      | 3.99                                                   | 8 | 0.136                                  | 8 | -1.60                       | 8 | -0.31                         | 7 |
| Aj                   | Dec-08 | n                      | 10.56                                                  | 5 | 0.075                                  | 5 | -1.70                       | 4 | -0.16                         | 4 |
| Aj                   | Jan-09 | n                      | 1.91                                                   | 6 | 0.072                                  | 6 | -2.80                       | 6 | -1.52                         | 5 |
| Aj                   | Feb-09 | n                      | 5.14                                                   | 6 | 0.167                                  | 6 | -1.50                       | 6 | -0.24                         | 5 |
| Aj                   | Mar-09 | n                      | 9.20                                                   | 7 | 0.233                                  | 7 | -1.91                       | 7 | -0.33                         | 7 |
| Aj                   | Apr-09 | n                      | 5.46                                                   | 8 | 0.245                                  | 8 | -2.20                       | 8 | -1.15                         | 8 |
| Aj                   | Nov-08 | w                      | 7.82                                                   | 8 | 0.131                                  | 8 | -1.73                       | 8 | -0.29                         | 7 |
| Aj                   | Dec-08 | w                      | 11.24                                                  | 6 | 0.097                                  | 6 | -1.73                       | 4 | -0.18                         | 4 |
| Aj                   | Jan-09 | w                      | 4.17                                                   | 6 | 0.136                                  | 6 | -1.70                       | 6 | -0.45                         | 5 |
| Aj                   | Feb-09 | w                      | 7.63                                                   | 6 | 0.153                                  | 6 | -1.47                       | 6 | -0.17                         | 5 |
| Aj                   | Mar-09 | w                      | 10.08                                                  | 7 | 0.141                                  | 7 | -1.83                       | 7 | -0.39                         | 7 |
| Aj                   | Apr-09 | w                      | 11.63                                                  | 8 | 0.178                                  | 8 | -1.65                       | 8 | -0.76                         | 8 |

*Continued overleaf...*

## Danthonioideae (C<sub>3</sub>)

| Species <sup>1</sup> | Month  | Treatment <sup>2</sup> | Net CO <sub>2</sub><br>assimilation rate<br>( $\mu\text{mol CO}_2 \text{ m}^{-2} \text{ s}^{-1}$ ) | N | Stomatal<br>conductance<br>( $\text{mol m}^{-2} \text{ s}^{-1}$ ) | N | Midday leaf<br>water<br>potential<br>(MPa) | N | Pre-dawn<br>leaf water<br>potential<br>(MPa) | N |
|----------------------|--------|------------------------|----------------------------------------------------------------------------------------------------|---|-------------------------------------------------------------------|---|--------------------------------------------|---|----------------------------------------------|---|
| Kc                   | Nov-08 | n                      | 5.89                                                                                               | 8 | 0.107                                                             | 8 | -1.89                                      | 4 | -0.73                                        | 4 |
| Kc                   | Dec-08 | n                      | 4.46                                                                                               | 3 | 0.116                                                             | 3 | -1.75                                      | 2 | -0.75                                        | 2 |
| Kc                   | Jan-09 | n                      | 0.07                                                                                               | 4 | 0.140                                                             | 4 | -3.00                                      | 4 | -1.50                                        | 4 |
| Kc                   | Feb-09 | n                      | 10.63                                                                                              | 6 | 0.196                                                             | 6 | -1.62                                      | 6 | -0.40                                        | 5 |
| Kc                   | Mar-09 | n                      | 1.65                                                                                               | 5 | 0.085                                                             | 5 | -2.24                                      | 5 | -0.59                                        | 5 |
| Kc                   | Apr-09 | n                      | 2.64                                                                                               | 6 | 0.108                                                             | 6 | -2.73                                      | 6 | -1.53                                        | 5 |
| Kc                   | Nov-08 | w                      | 3.85                                                                                               | 5 | 0.089                                                             | 5 | -2.03                                      | 5 | -0.76                                        | 4 |
| Kc                   | Dec-08 | w                      | 3.51                                                                                               | 3 | 0.129                                                             | 3 | -2.70                                      | 3 | -0.47                                        | 3 |
| Kc                   | Jan-09 | w                      | 3.33                                                                                               | 4 | 0.150                                                             | 4 | -2.23                                      | 4 | -0.88                                        | 3 |
| Kc                   | Feb-09 | w                      | 7.88                                                                                               | 4 | 0.193                                                             | 4 | -1.75                                      | 4 | -0.36                                        | 4 |
| Kc                   | Mar-09 | w                      | 5.83                                                                                               | 3 | 0.130                                                             | 3 | -2.33                                      | 3 | -0.50                                        | 3 |
| Kc                   | Apr-09 | w                      | 11.60                                                                                              | 3 | 0.161                                                             | 3 | -2.37                                      | 3 | -1.08                                        | 3 |
| Md                   | Nov-08 | n                      | 6.94                                                                                               | 7 | 0.138                                                             | 7 | -2.75                                      | 6 | -0.48                                        | 6 |
| Md                   | Dec-08 | n                      | 9.19                                                                                               | 5 | 0.138                                                             | 5 | -3.00                                      | 4 | -0.54                                        | 4 |
| Md                   | Jan-09 | n                      | 1.78                                                                                               | 6 | 0.055                                                             | 6 | -2.95                                      | 6 | -1.73                                        | 4 |
| Md                   | Feb-09 | n                      | 10.76                                                                                              | 4 | 0.185                                                             | 4 | -2.08                                      | 4 | -0.35                                        | 4 |
| Md                   | Mar-09 | n                      | 3.71                                                                                               | 7 | 0.087                                                             | 7 | -2.54                                      | 7 | -0.57                                        | 7 |
| Md                   | Apr-09 | n                      | 6.11                                                                                               | 8 | 0.102                                                             | 8 | -2.70                                      | 8 | -1.26                                        | 8 |
| Md                   | Nov-08 | w                      | 10.08                                                                                              | 8 | 0.136                                                             | 8 | -2.42                                      | 7 | -0.70                                        | 7 |
| Md                   | Dec-08 | w                      | 9.23                                                                                               | 5 | 0.132                                                             | 5 | -2.28                                      | 4 | -0.30                                        | 4 |
| Md                   | Jan-09 | w                      | 5.73                                                                                               | 6 | 0.137                                                             | 6 | -2.45                                      | 6 | -0.77                                        | 5 |
| Md                   | Feb-09 | w                      | 5.73                                                                                               | 5 | 0.170                                                             | 5 | -1.90                                      | 5 | -0.39                                        | 5 |
| Md                   | Mar-09 | w                      | 7.15                                                                                               | 7 | 0.117                                                             | 7 | -2.31                                      | 7 | -0.66                                        | 7 |
| Md                   | Apr-09 | w                      | 7.56                                                                                               | 8 | 0.127                                                             | 8 | -2.51                                      | 8 | -1.16                                        | 8 |
| Pc                   | Nov-08 | n                      | 5.46                                                                                               | 7 | 0.073                                                             | 7 | -2.13                                      | 6 | -0.47                                        | 5 |
| Pc                   | Dec-08 | n                      | 7.86                                                                                               | 3 | 0.095                                                             | 3 | -1.75                                      | 3 | -0.33                                        | 3 |
| Pc                   | Jan-09 | n                      | -                                                                                                  | - | -                                                                 | - | -                                          | - | -                                            | - |
| Pc                   | Feb-09 | n                      | 9.80                                                                                               | 4 | 0.121                                                             | 4 | -2.05                                      | 4 | -0.35                                        | 3 |
| Pc                   | Mar-09 | n                      | 0.91                                                                                               | 4 | 0.086                                                             | 4 | -2.58                                      | 4 | -1.26                                        | 4 |
| Pc                   | Apr-09 | n                      | 3.23                                                                                               | 6 | 0.059                                                             | 6 | -2.38                                      | 6 | -1.27                                        | 6 |
| Pc                   | Nov-08 | w                      | 10.48                                                                                              | 6 | 0.137                                                             | 6 | -2.23                                      | 6 | -0.53                                        | 6 |
| Pc                   | Dec-08 | w                      | 10.41                                                                                              | 5 | 0.133                                                             | 5 | -2.04                                      | 4 | -0.23                                        | 4 |
| Pc                   | Jan-09 | w                      | -                                                                                                  | - | -                                                                 | - | -                                          | - | -                                            | - |
| Pc                   | Feb-09 | w                      | 7.44                                                                                               | 7 | 0.129                                                             | 7 | -1.96                                      | 7 | -0.26                                        | 6 |
| Pc                   | Mar-09 | w                      | 6.26                                                                                               | 6 | 0.092                                                             | 6 | -2.27                                      | 6 | -0.53                                        | 6 |
| Pc                   | Apr-09 | w                      | 6.52                                                                                               | 6 | 0.100                                                             | 6 | -2.14                                      | 5 | -0.94                                        | 5 |
